# Supplementary material for: Degradable cross-linked polymer vesicles for the efficient delivery of platinum drugs
Source: Royal Society of Chemistry journal article supplement (doi:10.1039/c4py01123f), 2014-09-16
Supplement: c4py01123f1.pdf [file c4py01123f1.pdf]

SUPPORTING INFORMATION

**Degradable Cross-linked Polymer Vesicles for the Efficient Delivery of Platinum Drugs**

Qiang Fu,<sup>a #</sup> Jiangtao Xu,<sup>a, b #</sup> Katharina Ladewig,<sup>a</sup> Timothy M. A. Henderson,<sup>a</sup> Greg G. Qiao<sup>\*a</sup>

<sup>a</sup> Polymer Science Group, Department of Chemical and Biomolecular Engineering, The University of Melbourne, Parkville, VIC 3010, Australia

<sup>b</sup> Centre for Advanced Macromolecular Design (CAMD) and Australian Centre for NanoMedicine, School of Chemical Engineering, UNSW Australia, Sydney, NSW 2052, Australia.

\* Corresponding author: Fax: +61-3-83444153; email: [gregghq@unimelb.edu.au](mailto:gregghq@unimelb.edu.au)

# These authors contributed equally

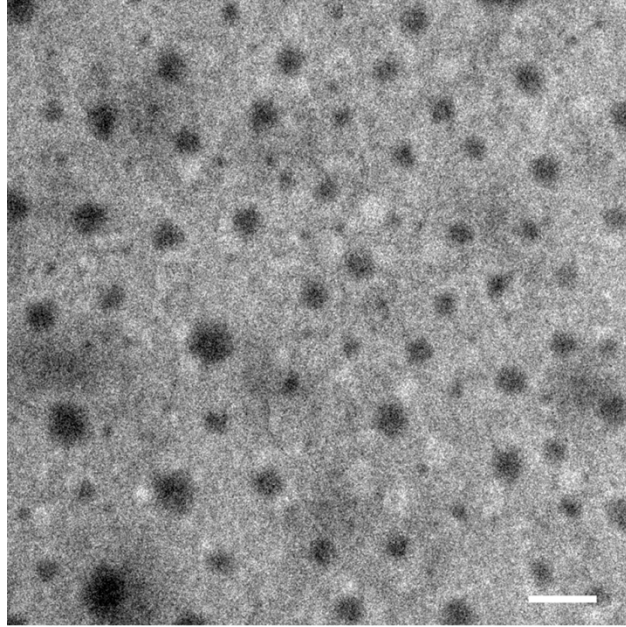

**Figure S1.** TEM images for the polymeric vesicles in acetone with positive staining. The scale bar represents 200 nm.

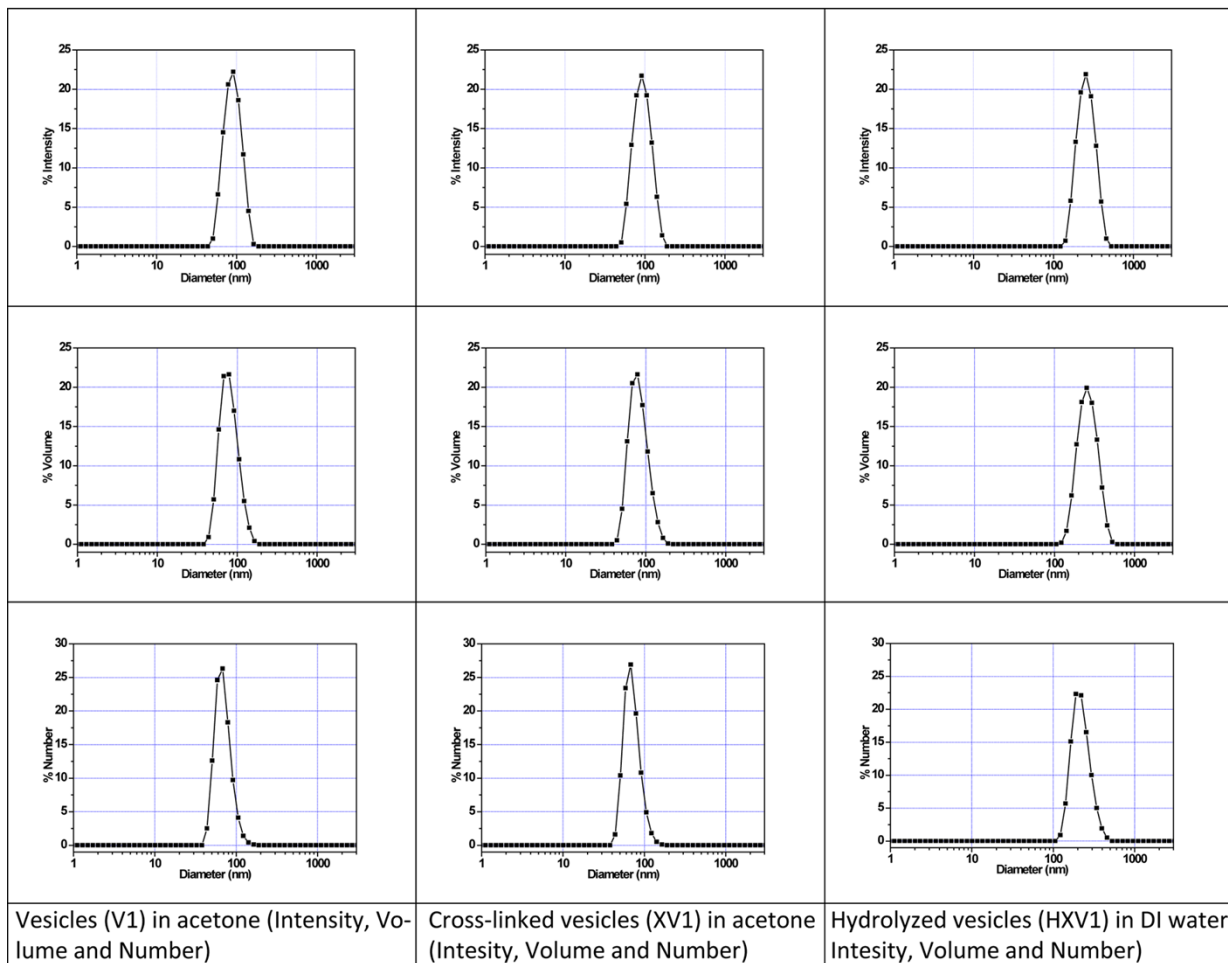

| Samples          | $D_h$ (Intensity)<br>(nm) | $D_h$ (Volume)<br>(nm) | $D_h$ (Number)<br>(nm) | DLS PDI | (cryo)TEM<br>(nm) |
|------------------|---------------------------|------------------------|------------------------|---------|-------------------|
| V1 in acetone,   | 95                        | 83                     | 71                     | 0.032   | ~ 80              |
| XV1 in acetone,  | 96                        | 85                     | 74                     | 0.045   | ~ 80              |
| HXV1 in DI water | 255                       | 264                    | 211                    | 0.093   | ~ 240             |

**Figure S2.** Summary of characterization data for cross-linked polymer vesicles measured by DLS and (cryo)TEM.

The platinum conjugation efficiency to the cross-linked vesicles was determined by TGA and is defined as follows:

$$f = \frac{m_{Pt,exp}}{m_{Pt,theo}} \times 100\% = \frac{W_{Pt}/M_{Pt}}{W_{diacid}/M_{diacid}} \times 100\% \quad (S1)$$

$$= \frac{18.2\%/195}{\left[ \left( 81.8\% - \frac{18.2\% \times 34.1\%}{65.9\%} \right) \times \frac{164 \times 25}{164 \times 35 + \left( \frac{162}{2} - 18 \right) \times 10 + 10000} \right] / 164} \times 100\%$$

$$= 85.2\%$$

where  $m_{Pt, exp}$  and  $m_{Pt, theo}$  are the molar amount of Pt determined by experimental data and the theoretical molar amount with 100% conversion, respectively (assuming that one Pt molecule forms a complex with one diacid repeating unit);  $W_{Pt}$  is the weight percent of Pt measured by TGA;  $M_{Pt}$  is the molecular weight of Pt;  $W_{diacid}$  is the weight percent of diacid repeat units calculated by subtracting the weight percent of cross-linked units;  $M_{diacid}$  is the molecular weight of the diacid repeating unit.

The platinum loading content within the polymer nanoparticles is defined as:

$$Loading\ content = \frac{amount\ of\ loaded\ CDDP}{amount\ of\ nanocarrier + amount\ of\ loaded\ CDDP} \times 100\% \quad (S2)$$

$$= \frac{10mg \times 85.2\%}{40mg + 10mg \times 85.2\%} \times 100\% = 17.6\%$$
